# Supplementary material for: Metabolic syndrome and hemorrhagic stroke among symptomatic CCMs in the Mexican Hispanic Population
Source: bioRxiv or medRxiv preprint supplement (doi:10.1101/2023.05.15.23289984), 2023-05-16
Supplement: Supplementary file [file media-1.pdf]

## **Metabolic syndrome and hemorrhagic stroke among symptomatic CCMs in the Mexican Hispanic Population**

Alok K. Dwivedi<sup>1</sup>, David Jang<sup>1</sup>, Ofek Belkin<sup>1</sup>, Justin Aickareth<sup>1</sup>, Mellisa Renteria<sup>1</sup>,  
Majd Hawwar<sup>1</sup>, Croft, Jacob<sup>1</sup>, Ammar M Kalas<sup>2</sup>, Marc Zuckerman<sup>2</sup>, Jun Zhang<sup>1\*</sup>

Departments of <sup>1</sup>Molecular and translational Medicine and <sup>2</sup>Internal Medicine

Texas Tech University Health Sciences Center, El Paso, TX, USA

### **Supplemental Materials**

\*All correspondence:

Jun Zhang, Sc.D., Ph.D.

Molecular and translational Medicine

Texas Tech University Health Sciences Center El Paso

5001 El Paso Dr., El Paso, TX 79905

Tel: (915) 215-4197

Email: [jun.zhang2000@gmail.com](mailto:jun.zhang2000@gmail.com)

## **Legends**

**Suppl Table 1. Variables of interest for data collection of CCM patients.** All clinical data from the patients admitted to TTUHSCEP/UMC presenting with confirmed or assumed cerebral cavernous malformations (CCMs) will be collected based on variables of interest.

**Suppl. Table 2. An interaction between age and metabolic syndrome (MetS) on hemorrhagic stroke among Mexican -Hispanic CCM patients**

**Suppl. Table 3. Distribution of MetS, epilepsy, and hemorrhagic stroke by age groups among Hispanic CCM patients**

**Suppl Table 1. Variables of interest for data collection of CCM patients.** All clinical data from the patients admitted to TTUHSCEP/UMC presenting with confirmed or assumed cerebral cavernous malformations (CCMs) and MetS parameters will be collected based on variables of interest listed below. (Note: not all risk factors were used in this study).

**Age years (EX: 32)**

**Date of first-ever ICH (if occurred) (year)**

**Date of the first-ever seizure (if occurred) (years)**

**Time point of any treatment (neurosurgery, radiosurgery) (if occurred) (year)**

**Confirmed familial disease (MRI pattern plus one affected relative or pos. genotyping) (yes/no)**

**Assumed familial disease (MRI pattern without an affected relative/genotyping) (yes/no)**

**Time point of the last follow-up at the hospital/institution (Year)**

**Confirmed mutation (CCM1/2/3) (if available)**

**Functional state (mRS) at last FU (if available)**

**Stroke Type (Ischemic 1 Hemorrhagic 2)**

**Place of Birth (Mexico, El Paso, UNK)**

**Admit Date (Year only)**

**Hypertension (1, yes; 2, no)**

**Hypertension numbers**

**Systolic BP at presentation**

**Diastolic BP at presentation**

**Mean Arterial Pressure number**

**Tobacco abuse (1, yes; 2, no)**

**Tobacco Info (packs/day)**

**Diabetes(1, yes; 2, no)**

**Diabetes Info (I/II; glucose Value)**

**Heart Disease (1, yes; 2, no)**

Suppl. Table 2

| Parameters             | OR    | 95%CI |        | p-value |
|------------------------|-------|-------|--------|---------|
| MetS                   | 0.01  | 0.00  | 1.43   | 0.071   |
| Age-years              | 1.00  | 0.98  | 1.02   | 0.904   |
| MetS and age           | 1.09  | 1.01  | 1.18   | 0.029   |
|                        |       |       |        |         |
| MeTS                   | 0.26  | 0.03  | 2.26   | 0.223   |
| Age $\geq$ 50          | 0.89  | 0.45  | 1.73   | 0.722   |
| MetS and Age $\geq$ 50 | 18.98 | 1.66  | 216.70 | 0.018   |

MetS: metabolic syndrome; OR: odds ratio; CI: confidence interval

Suppl. Table 3

| Parameters         | Age $\leq$ 35 | Age (35-50) | Age $\geq$ 50 | p-value |
|--------------------|---------------|-------------|---------------|---------|
| Sample size (N)    | 33            | 44          | 107           |         |
| Metabolic syndrome |               |             |               | 0.38    |
| No                 | 31 (93.9%)    | 37 (86.0%)  | 86 (83.5%)    |         |
| Yes                | 2 (6.1%)      | 6 (14.0%)   | 17 (16.5%)    |         |
| Epilepsy           |               |             |               | 0.77    |
| No                 | 24 (72.7%)    | 35 (79.5%)  | 79 (74.5%)    |         |
| Yes                | 9 (27.3%)     | 9 (20.5%)   | 27 (25.5%)    |         |
| Stroke             |               |             |               | 0.60    |
| No                 | 23 (69.7%)    | 29 (65.9%)  | 64 (60.4%)    |         |
| Yes                | 10 (30.3%)    | 15 (34.1%)  | 42 (39.6%)    |         |
| Hemorrhagic Stroke | OR, p-value   | OR, p-value | OR, p-value   |         |
| MetS-Yes           | 0.41, 0.575   | 0.44, 0.405 | 4.67, 0.006   |         |
| Epilepsy-Yes       | 0.65, 0.606   | 1.01, 0.987 | 2.37, 0.054   |         |

OR: odds ratio.
